# Supplementary material for: Technical Note: Effect of varying the λ = 185 and 254 nm photon flux ratio on radical generation in oxidation flow reactors
Source: Copernicus journal article supplement (doi:10.5194/acp-20-13417-2020), 2020-11-12
Supplement: Supplementary file 1 [file OFR185_char_v3_supplement.pdf › OFR185_char_v3_supplement.pdf]

# **Supplement to Technical Note: Effect of varying $\lambda = 185$ and 254 nm photon flux ratios on radical generation in oxidation flow reactors**

Jake Rowe<sup>1,+,\*</sup>, Andrew Lambe<sup>2,\*</sup>, and William Brune<sup>1</sup>

<sup>1</sup>Department of Meteorology and Atmospheric Science, Pennsylvania State University, University Park, PA, USA

<sup>2</sup>Center for Aerosol and Cloud Chemistry, Aerodyne Research Inc., Billerica, MA, USA

<sup>+</sup>Now at: Department of Chemistry, University of Colorado, Boulder, CO, USA

<sup>\*</sup>These authors contributed equally to this work.

**Correspondence:** Andrew T. Lambe (lambe@aerodyne.com)

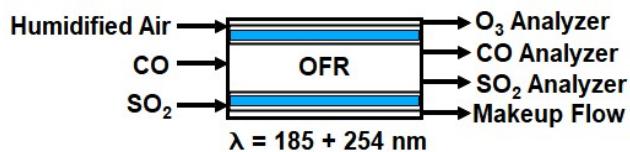

**Figure S1.** Simplified schematic of experimental setup used in this study.

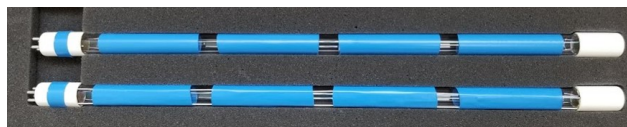

**Figure S2.** Photo of lamp type B used in this study. Heat shrink tubing applied to the external surface of the Hg lamp quartz caused equivalent reduction in  $I_{185}$  and  $I_{254}$ .

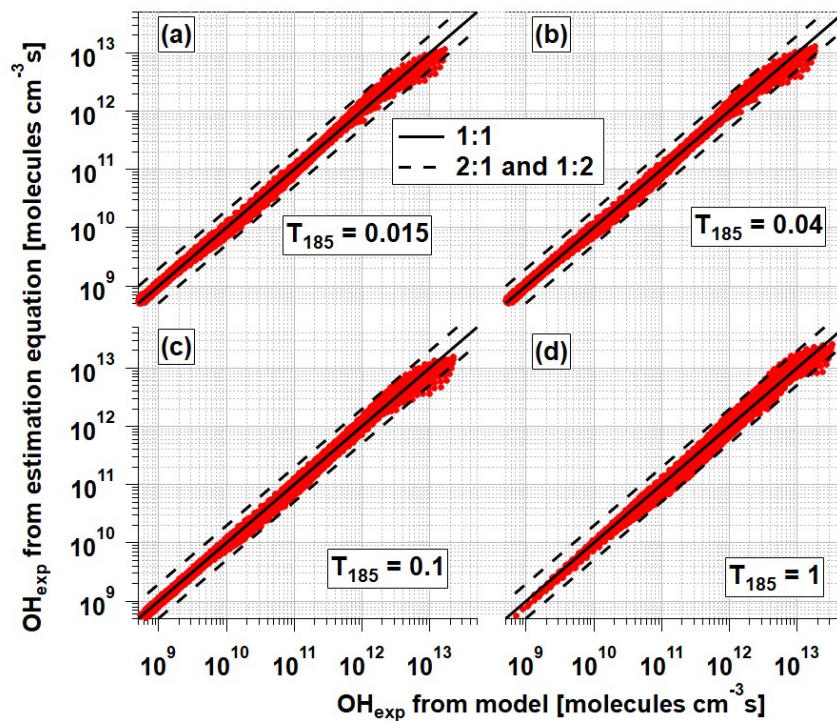

**Figure S3.** OH<sub>exp</sub> calculated from the estimation equation (Eq. 1) as a function of OH<sub>exp</sub> calculated from the full OFR185 KinSim mechanism (Table S1) for lamp types (a) E, (b) D and G, (c) C and F, and (d) A and B. Solid and dashed lines correspond to the 1:1 and the 1:2 and 2:1 lines, respectively. Estimation equation fit coefficients are shown in Table 1.

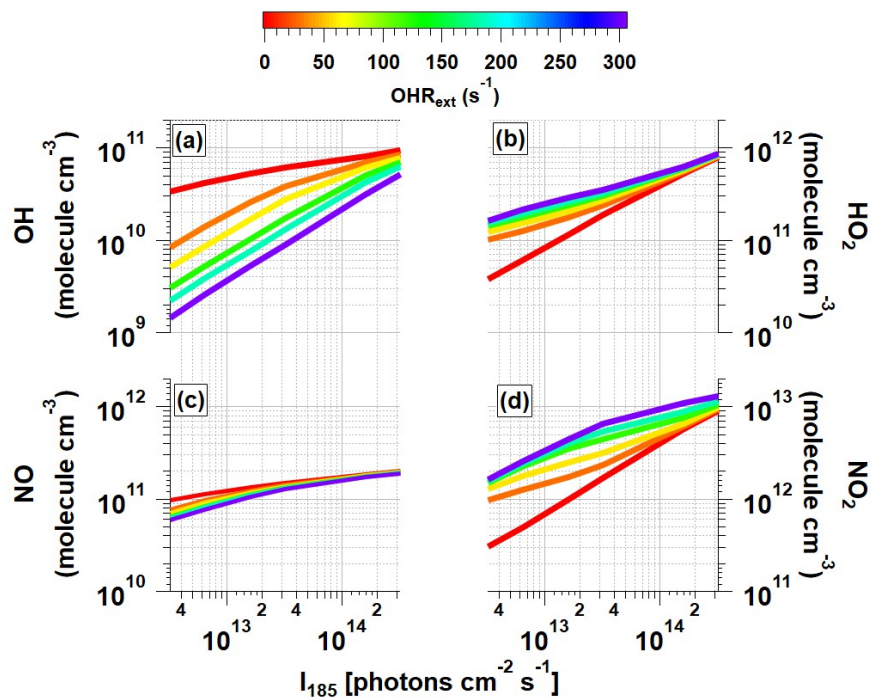

**Figure S4.** Concentrations of (a) OH, (b) HO<sub>2</sub>, (c) NO, and (d) NO<sub>2</sub> as a function of  $I_{185}$  and  $\text{OHR}_{\text{ext}}$  calculated using the OFR185 KinSim mechanism at the following base case OFR185 conditions:  $[\text{H}_2\text{O}] = [\text{N}_2\text{O}] = 2\%$ ,  $I_{254} = 3.2 \times 10^{15} \text{ photons cm}^{-2} \text{ s}^{-1}$ , and  $\tau_{\text{OFR}} = 124 \text{ s}$ .

Table S1: KinSim mechanism used to model OFR185 radical chemistry (Peng and Jimenez, 2020).

| Reactant 1         | Reactant 2                    | Product 1                     | Product 2          | Product 3          | $A_\infty$ | $E_\infty$ | $n_\infty$ | $A_0$   | $E_0$ | $n_0$ | $F_c$ | $f_0$ | $g$ |
|--------------------|-------------------------------|-------------------------------|--------------------|--------------------|------------|------------|------------|---------|-------|-------|-------|-------|-----|
| O( <sup>1</sup> D) | H <sub>2</sub> O              | OH                            | OH                 |                    | 1.63E-10   | -60        | 0          | 0       | 0     | 0     | 0     | 1     | 0   |
| O( <sup>1</sup> D) | N <sub>2</sub>                | O( <sup>3</sup> P)            | N <sub>2</sub>     |                    | 2.15E-11   | -110       | 0          | 0       | 0     | 0     | 0     | 1     | 0   |
| O( <sup>1</sup> D) | CO <sub>2</sub>               | O( <sup>3</sup> P)            | CO <sub>2</sub>    |                    | 7.5E-11    | -115       | 0          | 0       | 0     | 0     | 0     | 1     | 0   |
| O( <sup>1</sup> D) | O <sub>2</sub>                | O( <sup>3</sup> P)            | O <sub>2</sub>     |                    | 3.3E-11    | -55        | 0          | 0       | 0     | 0     | 0     | 1     | 0   |
| O( <sup>1</sup> D) | O <sub>3</sub>                | O <sub>2</sub>                | O <sub>2</sub>     |                    | 1.2E-10    | 0          | 0          | 0       | 0     | 0     | 0     | 1     | 0   |
| O( <sup>1</sup> D) | O <sub>3</sub>                | O <sub>2</sub>                | O( <sup>3</sup> P) | O( <sup>3</sup> P) | 1.2E-10    | 0          | 0          | 0       | 0     | 0     | 0     | 1     | 0   |
| O( <sup>1</sup> D) | H <sub>2</sub>                | OH                            | H                  |                    | 1.2E-10    | 0          | 0          | 0       | 0     | 0     | 0     | 1     | 0   |
| O( <sup>3</sup> P) | OH                            | O <sub>2</sub>                | H                  |                    | 1.8E-11    | -120       | 0          | 0       | 0     | 0     | 0     | 1     | 0   |
| O( <sup>3</sup> P) | HO <sub>2</sub>               | OH                            | O <sub>2</sub>     |                    | 3E-11      | -200       | 0          | 0       | 0     | 0     | 0     | 1     | 0   |
| O( <sup>3</sup> P) | H <sub>2</sub> O <sub>2</sub> | OH                            | HO <sub>2</sub>    |                    | 1.4E-12    | 2000       | 0          | 0       | 0     | 0     | 0     | 1     | 0   |
| O( <sup>3</sup> P) | O <sub>3</sub>                | O <sub>2</sub>                | O <sub>2</sub>     |                    | 8E-12      | 2060       | 0          | 0       | 0     | 0     | 0     | 1     | 0   |
| H                  | O <sub>3</sub>                | OH                            | O <sub>2</sub>     |                    | 1.4E-10    | 470        | 0          | 0       | 0     | 0     | 0     | 1     | 0   |
| OH                 | O <sub>3</sub>                | HO <sub>2</sub>               | O <sub>2</sub>     |                    | 1.7E-12    | 940        | 0          | 0       | 0     | 0     | 0     | 1     | 0   |
| HO <sub>2</sub>    | NO                            | OH                            | NO <sub>2</sub>    |                    | 3.3E-12    | -270       | 0          | 0       | 0     | 0     | 0     | 1     | 0   |
| HO <sub>2</sub>    | O <sub>3</sub>                | OH                            | O <sub>2</sub>     | O <sub>2</sub>     | 1E-14      | 490        | 0          | 0       | 0     | 0     | 0     | 1     | 0   |
| OH                 | HO <sub>2</sub>               | H <sub>2</sub> O              | O <sub>2</sub>     |                    | 4.8E-11    | -250       | 0          | 0       | 0     | 0     | 0     | 1     | 0   |
| H                  | HO <sub>2</sub>               | OH                            | OH                 |                    | 7.2E-11    | 0          | 0          | 0       | 0     | 0     | 0     | 1     | 0   |
| H                  | HO <sub>2</sub>               | O( <sup>3</sup> P)            | H <sub>2</sub> O   |                    | 1.6E-12    | 0          | 0          | 0       | 0     | 0     | 0     | 1     | 0   |
| H                  | HO <sub>2</sub>               | O <sub>2</sub>                | H <sub>2</sub>     |                    | 6.9E-12    | 0          | 0          | 0       | 0     | 0     | 0     | 1     | 0   |
| OH                 | H <sub>2</sub>                | H <sub>2</sub> O              | H                  |                    | 2.8E-12    | 1800       | 0          | 0       | 0     | 0     | 0     | 1     | 0   |
| OH                 | OH                            | H <sub>2</sub> O              | O( <sup>3</sup> P) |                    | 1.8E-12    | 0          | 0          | 0       | 0     | 0     | 0     | 1     | 0   |
| NO                 | O <sub>3</sub>                | NO <sub>2</sub>               | O <sub>2</sub>     |                    | 3E-12      | 1500       | 0          | 0       | 0     | 0     | 0     | 1     | 0   |
| NO <sub>2</sub>    | O <sub>3</sub>                | NO <sub>3</sub>               | O <sub>2</sub>     |                    | 1.2E-13    | 2450       | 0          | 0       | 0     | 0     | 0     | 1     | 0   |
| OH                 | H <sub>2</sub> O <sub>2</sub> | H <sub>2</sub> O              | HO <sub>2</sub>    |                    | 1.8E-12    | 0          | 0          | 0       | 0     | 0     | 0     | 1     | 0   |
| HO <sub>2</sub>    | NO <sub>2</sub>               | HNO <sub>4</sub>              |                    |                    | 2.9E-12    | 0          | 1.1        | 2E-31   | 0     | 3.4   | 0     | 1     | 0   |
| OH                 | HNO <sub>4</sub>              | H <sub>2</sub> O              | O <sub>2</sub>     | NO <sub>2</sub>    | 1.3E-12    | -380       | 0          | 0       | 0     | 0     | 0     | 1     | 0   |
| O( <sup>1</sup> D) | N <sub>2</sub>                | N <sub>2</sub> O              |                    |                    | 0          | 0          | 0          | 2.8E-36 | 0     | 0.9   | 0     | 1     | 0   |
| OH                 | NO <sub>2</sub>               | HNO <sub>3</sub>              |                    |                    | 2.9E-11    | 0          | 1.1        | 1.8E-30 | 0     | 3     | 0     | 1     | 0   |
| O( <sup>3</sup> P) | O <sub>2</sub>                | O <sub>3</sub>                |                    |                    | 0          | 0          | 0          | 6E-34   | 0     | 2.4   | 0     | 1     | 0   |
| H                  | O <sub>2</sub>                | HO <sub>2</sub>               |                    |                    | 7.5E-11    | 0          | -0.2       | 4.4E-32 | 0     | 1.3   | 0     | 1     | 0   |
| OH                 | OH                            | H <sub>2</sub> O <sub>2</sub> |                    |                    | 2.6E-11    | 0          | 0          | 6.9E-31 | 0     | 1     | 0     | 1     | 0   |

|                               |                    |                               |                    |                |           |       |      |         |       |     |      |   |   |
|-------------------------------|--------------------|-------------------------------|--------------------|----------------|-----------|-------|------|---------|-------|-----|------|---|---|
| OH                            | SO <sub>2</sub>    | HSO <sub>3</sub>              |                    |                | 1.6E-12   | 0     | 0    | 3.3E-31 | 0     | 4.3 | 0    | 1 | 0 |
| HSO <sub>3</sub>              | O <sub>2</sub>     | HO <sub>2</sub>               | SO <sub>3</sub>    |                | 1.3E-12   | 300   | 0    | 0       | 0     | 0   | 0    | 1 | 0 |
| OH                            | HNO <sub>3</sub>   | H <sub>2</sub> O              | NO <sub>3</sub>    |                | 2.4E-14   | -460  | 0    | 6.5E-34 | -1335 | 0   | 0    | 1 | 0 |
| O <sub>2</sub>                | HV185              | O( <sup>3</sup> P)            | O( <sup>3</sup> P) |                | 1.1E-20   | 0     | 0    | 0       | 0     | 0   | 0    | 1 | 0 |
| O <sub>3</sub>                | HV254              | O <sub>2</sub>                | O( <sup>1</sup> D) |                | 1.03E-17  | 0     | 0    | 0       | 0     | 0   | 0    | 1 | 0 |
| H <sub>2</sub> O <sub>2</sub> | HV185              | HO <sub>2</sub>               |                    |                | 1E-19     | 0     | 0    | 0       | 0     | 0   | 0    | 1 | 0 |
| H <sub>2</sub> O <sub>2</sub> | HV254              | OH                            |                    |                | 6.7E-20   | 0     | 0    | 0       | 0     | 0   | 0    | 1 | 0 |
| HO <sub>2</sub>               | HV254              | OH                            |                    |                | 2.63E-19  | 0     | 0    | 0       | 0     | 0   | 0    | 1 | 0 |
| HO <sub>2</sub>               | HV185              | OH                            |                    |                | 3.68E-18  | 0     | 0    | 0       | 0     | 0   | 0    | 1 | 0 |
| H <sub>2</sub> O              | HV185              | OH                            | H                  |                | 6.78E-20  | 0     | 0    | 0       | 0     | 0   | 0    | 1 | 0 |
| HO <sub>2</sub>               | HO <sub>2</sub>    | H <sub>2</sub> O <sub>2</sub> | O <sub>2</sub>     |                | 3E-13     | -600  | 0    | 2.1E-33 | -1000 | 0   | 0    | 1 | 0 |
| O( <sup>3</sup> P)            | NO                 | NO <sub>2</sub>               |                    |                | 3E-11     | 0     | 0    | 9E-32   | 0     | 1.5 | 0    | 1 | 0 |
| O( <sup>3</sup> P)            | NO <sub>2</sub>    | NO                            | O <sub>2</sub>     |                | 5.1E-12   | -210  | 0    | 0       | 0     | 0   | 0    | 1 | 0 |
| O( <sup>3</sup> P)            | NO <sub>2</sub>    | NO <sub>3</sub>               |                    |                | 2.2E-11   | 0     | 0.7  | 2.5E-31 | 0     | 1.8 | 0    | 1 | 0 |
| O( <sup>3</sup> P)            | NO <sub>3</sub>    | O <sub>2</sub>                | NO <sub>2</sub>    |                | 1E-11     | 0     | 0    | 0       | 0     | 0   | 0    | 1 | 0 |
| OH                            | NO                 | HNO <sub>2</sub>              |                    |                | 3.6E-11   | 0     | 0.1  | 7E-31   | 0     | 2.6 | 0    | 1 | 0 |
| OH                            | HNO <sub>2</sub>   | H <sub>2</sub> O              | NO <sub>2</sub>    |                | 1.8E-11   | 390   | 0    | 0       | 0     | 0   | 0    | 1 | 0 |
| HO <sub>2</sub>               | NO <sub>3</sub>    | OH                            | NO <sub>2</sub>    | O <sub>2</sub> | 3.5E-12   | 0     | 0    | 0       | 0     | 0   | 0    | 1 | 0 |
| HO <sub>2</sub>               | NO <sub>3</sub>    | NO                            | NO <sub>2</sub>    | O <sub>2</sub> | 4.5E-14   | 1260  | 0    | 0       | 0     | 0   | 0    | 1 | 0 |
| NO <sub>2</sub>               | NO <sub>3</sub>    | N <sub>2</sub> O <sub>5</sub> |                    |                | 1.4E-12   | 0     | 0.7  | 2E-30   | 0     | 4.4 | 0    | 1 | 0 |
| NO <sub>3</sub>               | NO <sub>3</sub>    | NO <sub>2</sub>               | NO <sub>2</sub>    | O <sub>2</sub> | 8.5E-13   | 2450  | 0    | 0       | 0     | 0   | 0    | 1 | 0 |
| O <sub>3</sub>                | HNO <sub>2</sub>   | O <sub>2</sub>                | HNO <sub>3</sub>   |                | 2.5E-19   | 0     | 0    | 0       | 0     | 0   | 0    | 1 | 0 |
| N <sub>2</sub> O <sub>5</sub> | H <sub>2</sub> O   | HNO <sub>3</sub>              | HNO <sub>3</sub>   |                | 1E-21     | 0     | 0    | 0       | 0     | 0   | 0    | 1 | 0 |
| NO <sub>2</sub>               | HV185              | NO                            | O( <sup>1</sup> D) |                | 6.882E-18 | 0     | 0    | 0       | 0     | 0   | 0    | 1 | 0 |
| NO <sub>2</sub>               | HV185              | NO                            | O( <sup>3</sup> P) |                | 1.05E-20  | 0     | 0    | 0       | 0     | 0   | 0    | 1 | 0 |
| N <sub>2</sub> O              | HV185              | N <sub>2</sub>                | O( <sup>1</sup> D) |                | 1.43E-19  | 0     | 0    | 0       | 0     | 0   | 0    | 1 | 0 |
| HNO <sub>4</sub>              |                    | NO <sub>2</sub>               | HO <sub>2</sub>    |                | 6E+15     | 11170 | 0    | 4.1E-05 | 10650 | 0   | 0.4  | 1 | 0 |
| N <sub>2</sub> O <sub>5</sub> |                    | NO <sub>2</sub>               | NO <sub>3</sub>    |                | 9.7E+14   | 11000 | 0.1  | 0.0013  | 11000 | 3.5 | 0.35 | 1 | 0 |
| N <sub>2</sub> O              | O( <sup>1</sup> D) | N <sub>2</sub>                | O <sub>2</sub>     |                | 4.64E-11  | -20   | 0    | 0       | 0     | 0   | 0    | 1 | 0 |
| N <sub>2</sub> O              | O( <sup>1</sup> D) | NO                            | NO                 |                | 7.26E-11  | -20   | 0    | 0       | 0     | 0   | 0    | 1 | 0 |
| OH                            | CO                 | HO <sub>2</sub>               | CO <sub>2</sub>    |                | 1.5E-13   | 0     | -0.6 | 0       | 0     | 0   | 0    | 1 | 0 |
| OH                            | CO                 | HOCO                          |                    |                | 1.1E-12   | 0     | -1.3 | 5.9E-33 | 0     | 0.4 | 0    | 1 | 0 |

## References

Peng, Z. and Jimenez, J. L.: Radical chemistry in oxidation flow reactors for atmospheric chemistry research, Chem. Soc. Rev., <http://dx.doi.org/10.1039/C9CS00766K>, 2020.
