# Supplementary material for: Technical Note: Effect of varying the λ = 185 and 254 nm photon flux ratio on radical generation in oxidation flow reactors
Source: Copernicus journal article supplement (doi:10.5194/acp-20-13417-2020), 2020-11-12
Supplement: Supplementary file [file acp-20-13417-2020-supplement-title-page.pdf › acp-20-13417-2020-supplement-title-page.pdf]

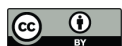

## *Supplement of*

# **Technical Note: Effect of varying the $\lambda = 185$ and 254 nm photon flux ratio on radical generation in oxidation flow reactors**

**Jake P. Rowe et al.**

*Correspondence to:* Andrew T. Lambe ([lambe@aerodyne.com](mailto:lambe@aerodyne.com))

- [acp-20-13417-2020-supplement-title-page.pdf](#)
- [KinSim\\_OFR185\\_Mechanism.itx](#)
- [OFR185\\_char\\_v3\\_supplement.pdf](#)

The copyright of individual parts of the supplement might differ from the CC BY 4.0 License.
